# Supplementary material for: Blood Cell Separation Using Polypropylene-Based Microfluidic Devices Based on Deterministic Lateral Displacement
Source: MDPI journal article supplement (doi:10.3390/mi14020238), 2023-01-17
Supplement: s1 [file s1]

## Supplementary Materials

### Blood cell separation using polypropylene-based microfluidic devices based on deterministic lateral displacement

Koji Matsuura <sup>1,\*</sup> and Koji Takata <sup>2</sup>

1 Department of Biosciences, Faculty of Life Science, Okayama University of Science;  
kmatsuura@ous.ac.jp

2 Life Materials Development Section, Human Life Technology Research Institute,  
Toyama Industrial Technology Research and Development Center; takata@itc.pref.toyama.jp

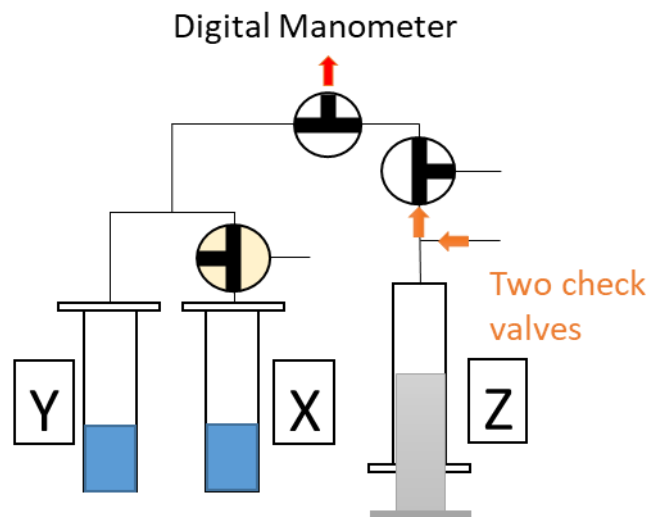

**Figure S1.** An illustration of the air channel to set a digital manometer for air pressure detection inside syringes X and Y.

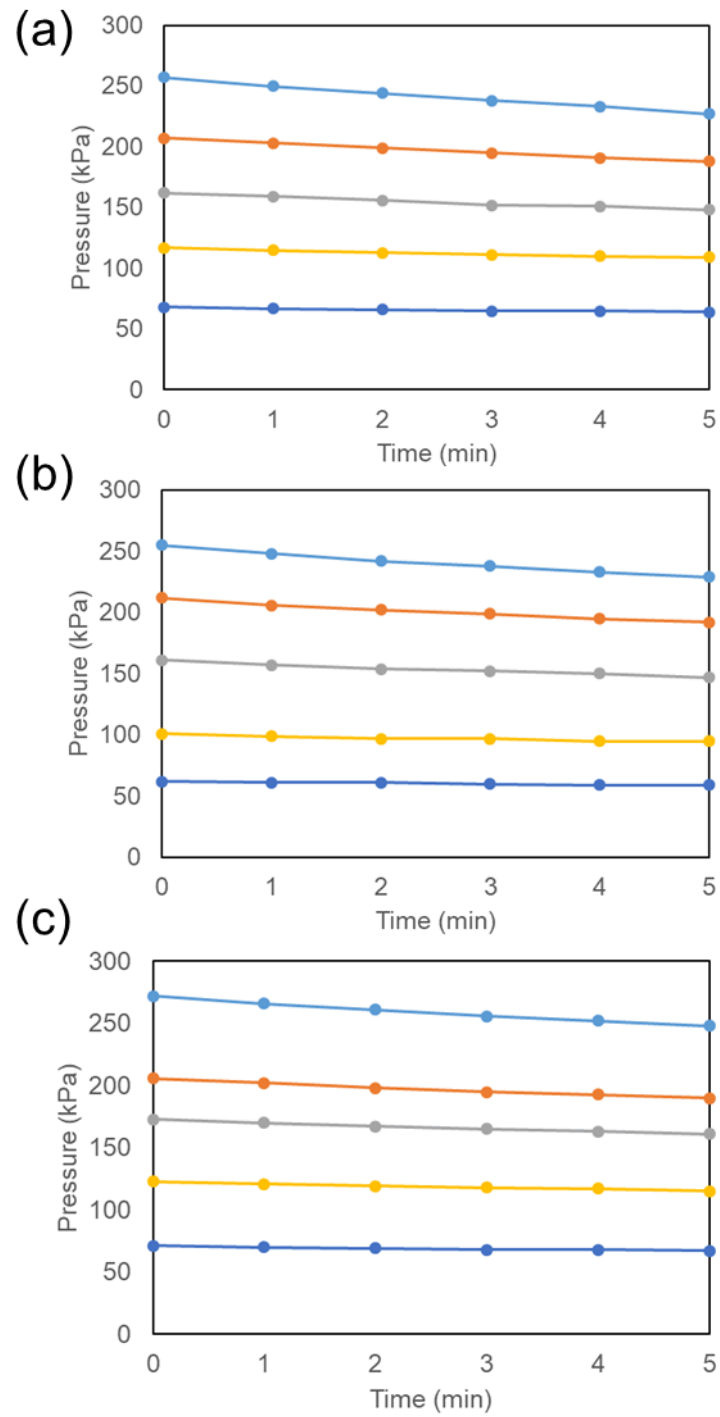

**Figure S2.** Air pressure changes inside syringes X and Y of **(a)** Chip 1, **(b)** Chip 2, and **(c)** Chip 3. The pressure drop of all of the chips over 5 min were similar.

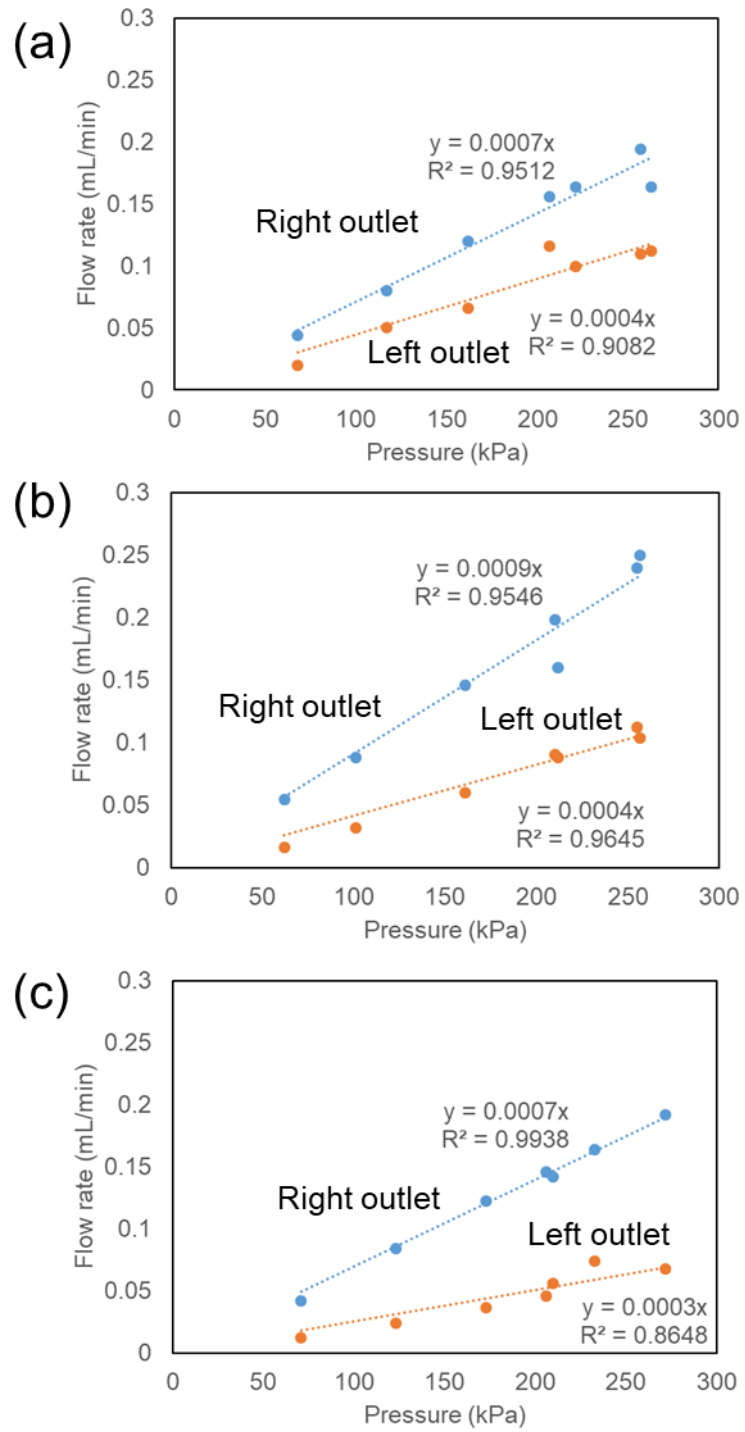

**Figure S3.** Correlation between the pressure and outlet flow rates of **(a)** Chip 1, **(b)** Chip 2, and **(c)** Chip 3. The flow rate was proportional to the air pressure inside syringes X and Y.

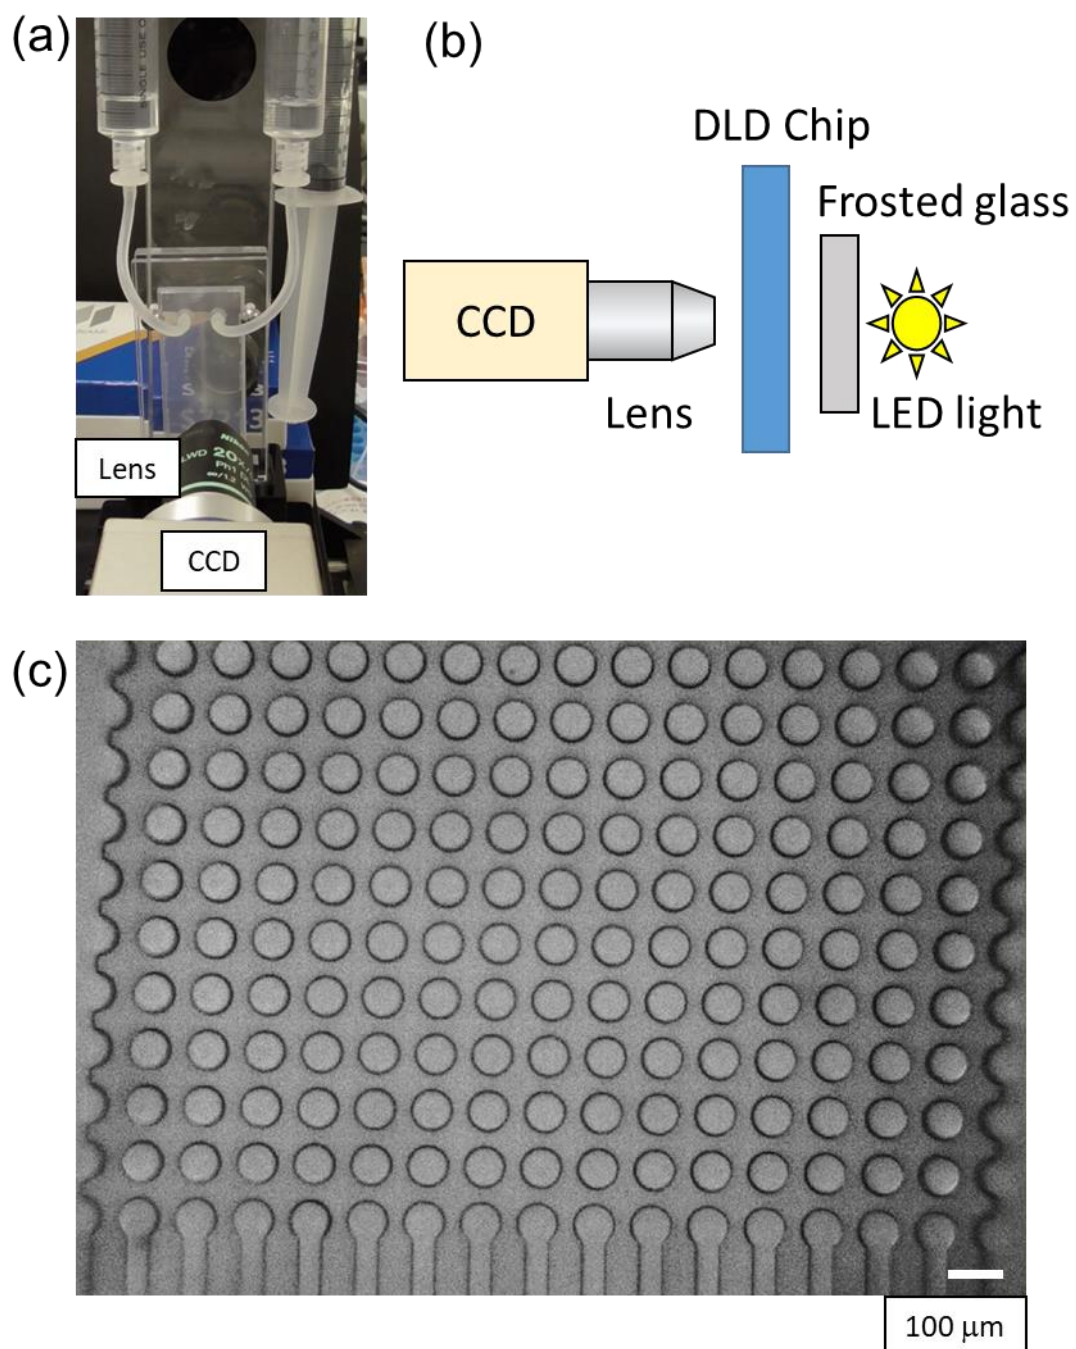

**Figure S4.** (a) A photograph of the observation setup from the side. (b) A schematic presentation of optical alignment. (c) A microscopic image of the outlet entrance of Chip 1.
